# Supplementary material for: Nanoparticle retarded shape relaxation of dispersed droplets in polymer blends: an understanding from the viewpoint of molecular movement
Source: Royal Society of Chemistry journal article supplement (doi:10.1039/c4ra04380d), 2014-01-01
Supplement: c4ra04380d1.pdf [file c4ra04380d1.pdf]

## Supported information

### Nanoparticle retarded shape relaxation of dispersed droplets in polymer blends: an understanding from the viewpoint of molecular movement

*Xi-Qiang Liu, Zhen-Yi Sun, Rui-Ying Bao, Wei Yang\*, Bang-Hu Xie, Ming-Bo Yang*

College of Polymer Science and Engineering, Sichuan University, State Key Laboratory of  
Polymer Materials Engineering, Chengdu, 610065, Sichuan, China

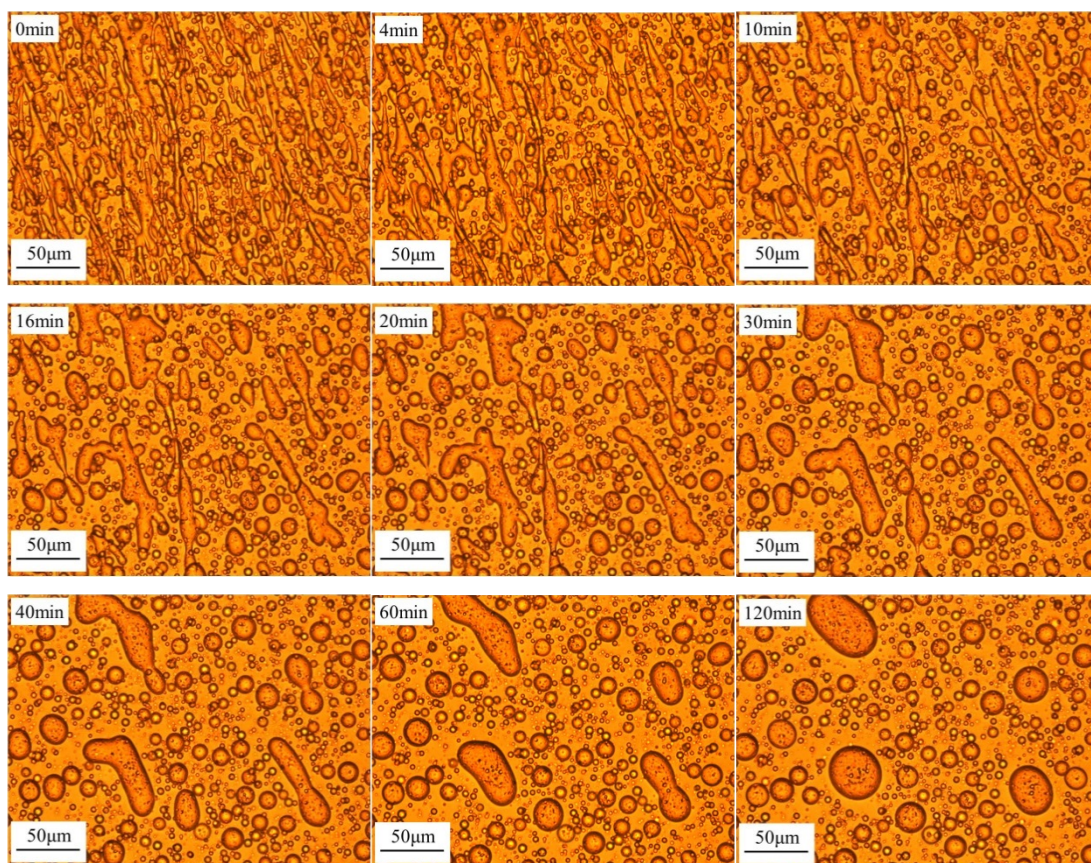

**Figure 1 Morphology development of 2wt% A200 nano-silica particle (relative to the weight of PS phase) filled PP/PS 70/30 blend during annealing at 190°C**



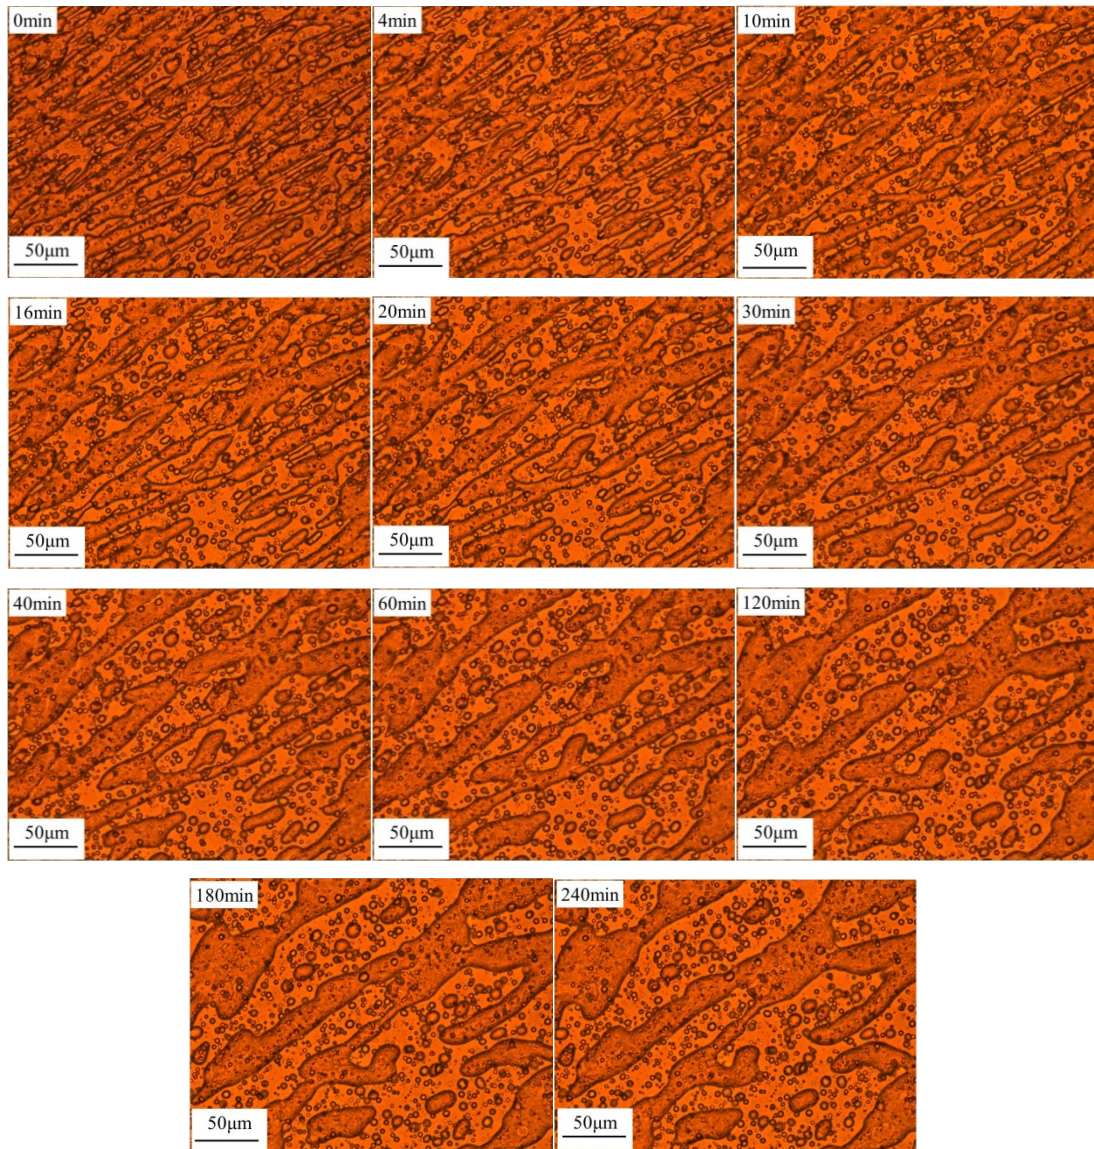

**Figure 2 Morphology development of 8wt% A200 nano-silica particle (relative to the weight of PS phase) filled PP/PS 70/30 blend during annealing at 190°C**
